# Supplementary material for: Ultrasound-assisted microalgal docosahexaenoic acid (DHA) nanoemulsion preparation using casein, chitosan, and pectin as emulsifiers for enhanced oxidative stability and shelf life for food fortification
Source: Royal Society of Chemistry journal article supplement (doi:10.1039/d5fb00388a), 2025-11-24
Supplement: d5fb00388a1.pdf [file d5fb00388a1.pdf]

SUPPLEMENTARY DATA

**Table 1** Visual stability evaluation of DHA nanoemulsions prepared using various emulsifiers

| Emulsifier | Concentration (%) | T80 (%) | Poor dissolution of emulsifier | Visible floating of oil after ultrasonication | Phase separation after 24 h | Phase separation after 7 days |
|------------|-------------------|---------|--------------------------------|-----------------------------------------------|-----------------------------|-------------------------------|
| Casein     | 3                 | 1       | Nil                            | *                                             | *                           | *                             |
|            | 5                 | 1       | Nil                            | Nil                                           | **                          | *                             |
|            | 8                 | 1       | Nil                            | Nil                                           | **                          | *                             |
|            | 10                | 1       | Nil                            | Nil                                           | **                          | *                             |
|            | 13                | 1       | Nil                            | Nil                                           | **                          | *                             |
|            | 15                | 1       | Nil                            | Nil                                           | **                          | *                             |
|            | 20                | 1       | *                              | Nil                                           | *                           | *                             |
| Chitosan   | 0.5               | 1       | *                              | Nil                                           | *                           | *                             |
|            | 1                 | 1       | Nil                            | Nil                                           | **                          | **                            |
|            | 1.5               | 1       | Nil                            | Nil                                           | **                          | **                            |
|            | 2                 | 1       | Nil                            | Nil                                           | **                          | *                             |
|            | 3                 | 1       | *                              | Nil                                           | **                          | *                             |
| Pectin     | 2                 | 1       | Nil                            | *                                             | *                           | *                             |
|            | 3                 | 1       | Nil                            | Nil                                           | **                          | *                             |
|            | 3.5               | 1       | Nil                            | Nil                                           | **                          | **                            |
|            | 4                 | 1       | Nil                            | Nil                                           | **                          | *                             |
|            | 5                 | 1       | Nil                            | Nil                                           | **                          | *                             |
|            | 6                 | 1       | Nil                            | Nil                                           | **                          | *                             |
|            | 6.5               | 1       | *                              | Nil                                           | *                           | *                             |

\* Phase separation/ unstable, \*\*No phase separation/ stable

**Table 2** Color analysis of kalakand fortified with DHA nanoemulsion

| Number of days | Color parameters | KCON                    | KDHO                    | KCDN                    |
|----------------|------------------|-------------------------|-------------------------|-------------------------|
| <b>Day 1</b>   | <b>L*</b>        | 65.56±0.12 <sup>d</sup> | 67.08±0.29 <sup>d</sup> | 68.70±0.05 <sup>d</sup> |
|                | <b>a*</b>        | 1.05±0.04 <sup>d</sup>  | 1.14±0.02 <sup>d</sup>  | 0.66±0.1 <sup>c</sup>   |
|                | <b>b*</b>        | 22.43±0.06 <sup>d</sup> | 22.71±0.06 <sup>d</sup> | 20.35±0.12 <sup>d</sup> |
| <b>Day 4</b>   | <b>L*</b>        | 66.62±0.28 <sup>c</sup> | 68.52±0.1 <sup>c</sup>  | 69.5±0.05 <sup>c</sup>  |
|                | <b>a*</b>        | 1.17±0.02 <sup>c</sup>  | 1.29±0.03 <sup>c</sup>  | 0.71±0.03 <sup>b</sup>  |
|                | <b>b*</b>        | 22.52±0.06 <sup>c</sup> | 23.90±0.21 <sup>c</sup> | 21.62±0.02 <sup>c</sup> |
| <b>Day 7</b>   | <b>L*</b>        | 67.52±0.01 <sup>b</sup> | 69.5±0.21 <sup>b</sup>  | 71.66±0.28 <sup>b</sup> |
|                | <b>a*</b>        | 1.22±0.03 <sup>b</sup>  | 1.33±0.02 <sup>b</sup>  | 0.82±0.02 <sup>a</sup>  |
|                | <b>b*</b>        | 23.59±0.02 <sup>b</sup> | 24.11±0.06 <sup>b</sup> | 22.48±0.09 <sup>b</sup> |
| <b>Day 10</b>  | <b>L*</b>        | 68.67±0.01 <sup>a</sup> | 71.47±0.06 <sup>a</sup> | 72.63±0.05 <sup>a</sup> |
|                | <b>a*</b>        | 1.31±0.02 <sup>a</sup>  | 1.4±0.02 <sup>a</sup>   | 1.12±0.02 <sup>a</sup>  |
|                | <b>b*</b>        | 24.63±0.06 <sup>a</sup> | 22.56±0.12 <sup>a</sup> | 22.68±0.05 <sup>a</sup> |
|                | <b>ΔE</b>        | 3.32±0.2 <sup>b</sup>   | 4.41±0.1 <sup>a</sup>   | 3.95±0.1 <sup>ab</sup>  |

KCON- Kalakand control; KDHO- Kalakand with neat DHA oil; KCDN- Kalakand with DHA nanoemulsion.

Data are articulated as mean ± standard deviation (n = 3). In an individual row, each value tailed by a different letter is significantly different ( $P \leq 0.05$ ) between samples as determined by Tukey's test

**Step 1: Preparation of milk solids**

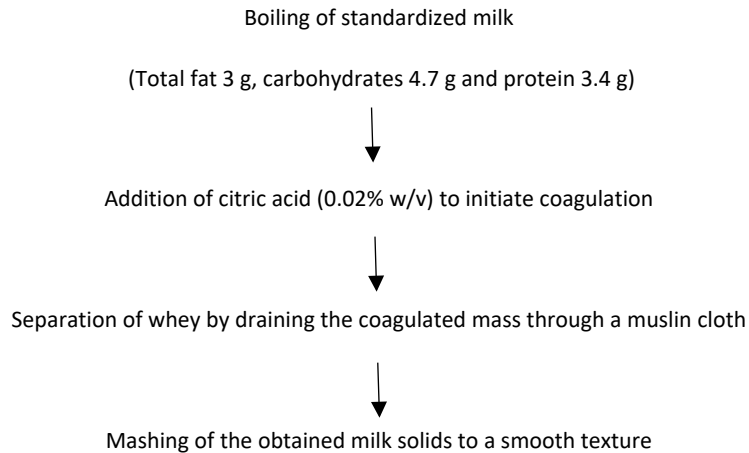

**Step 2: Preparation of kalakand**

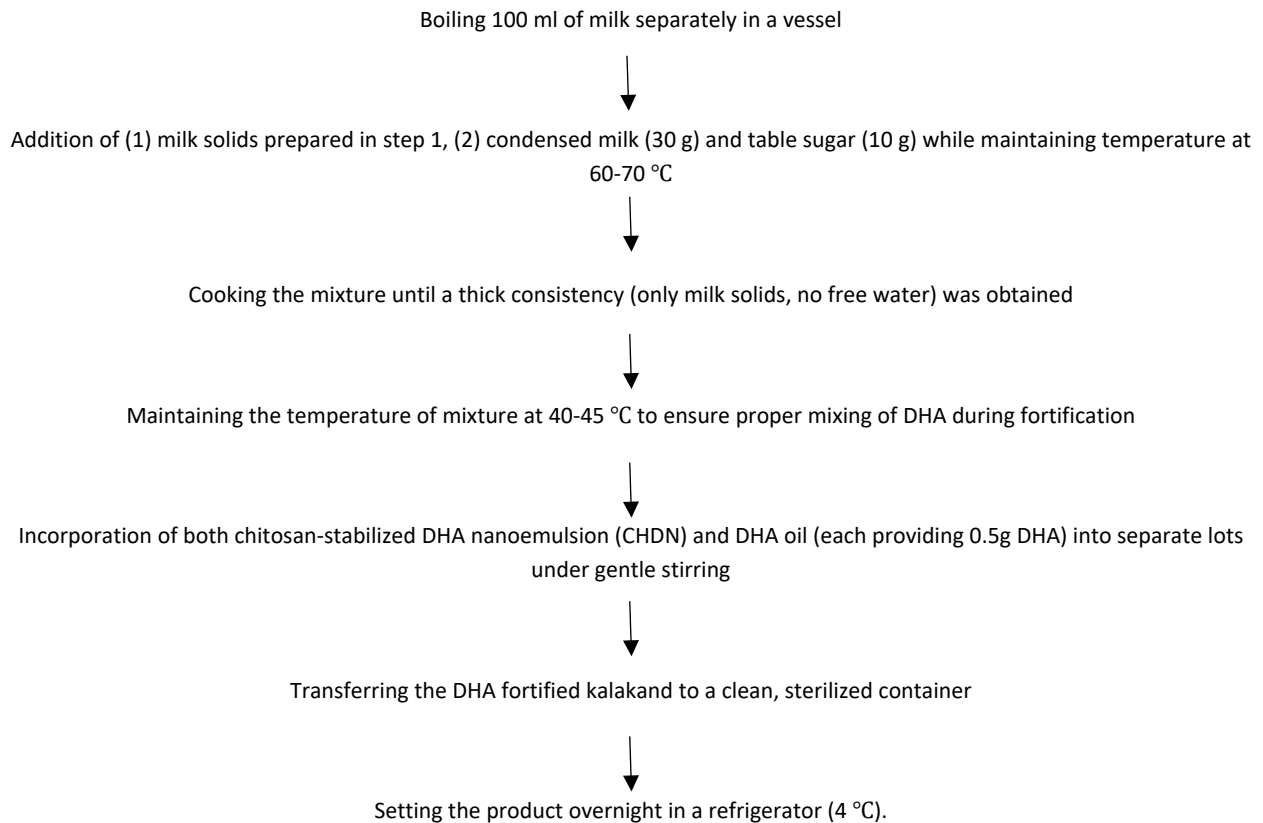

**Figure 1-** Flowchart of the preparation of DHA fortified kalakand

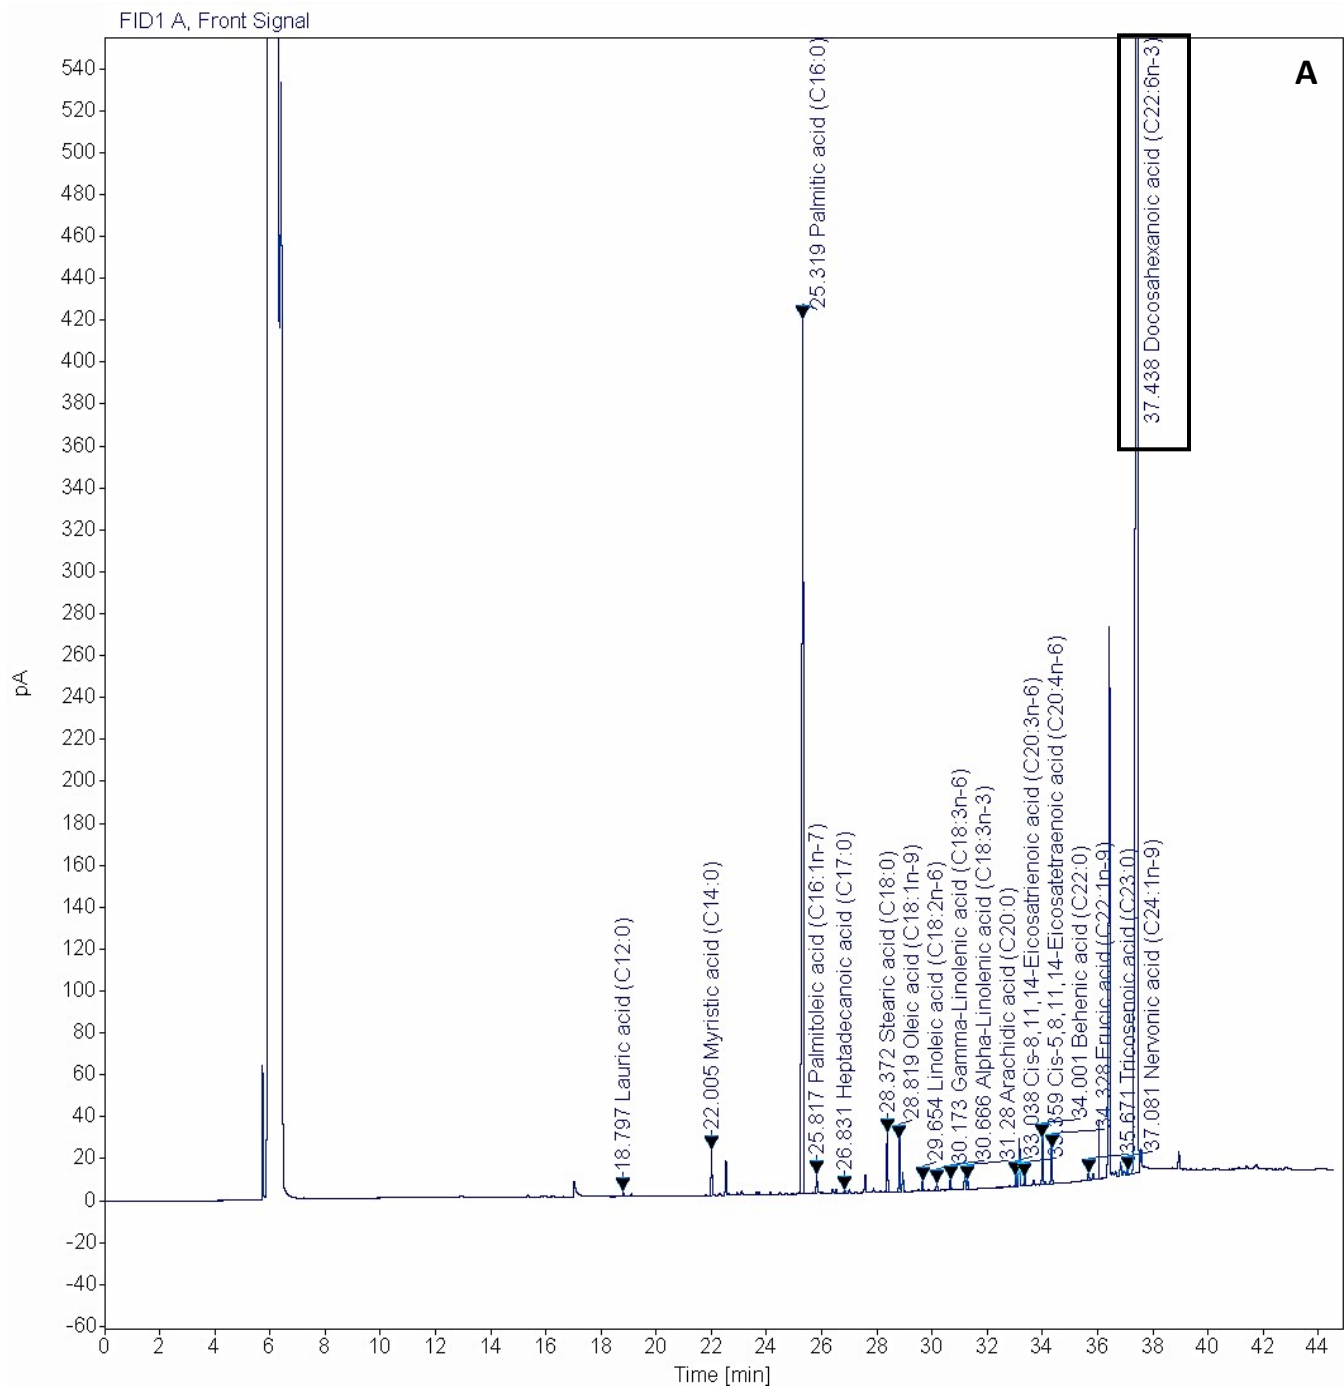

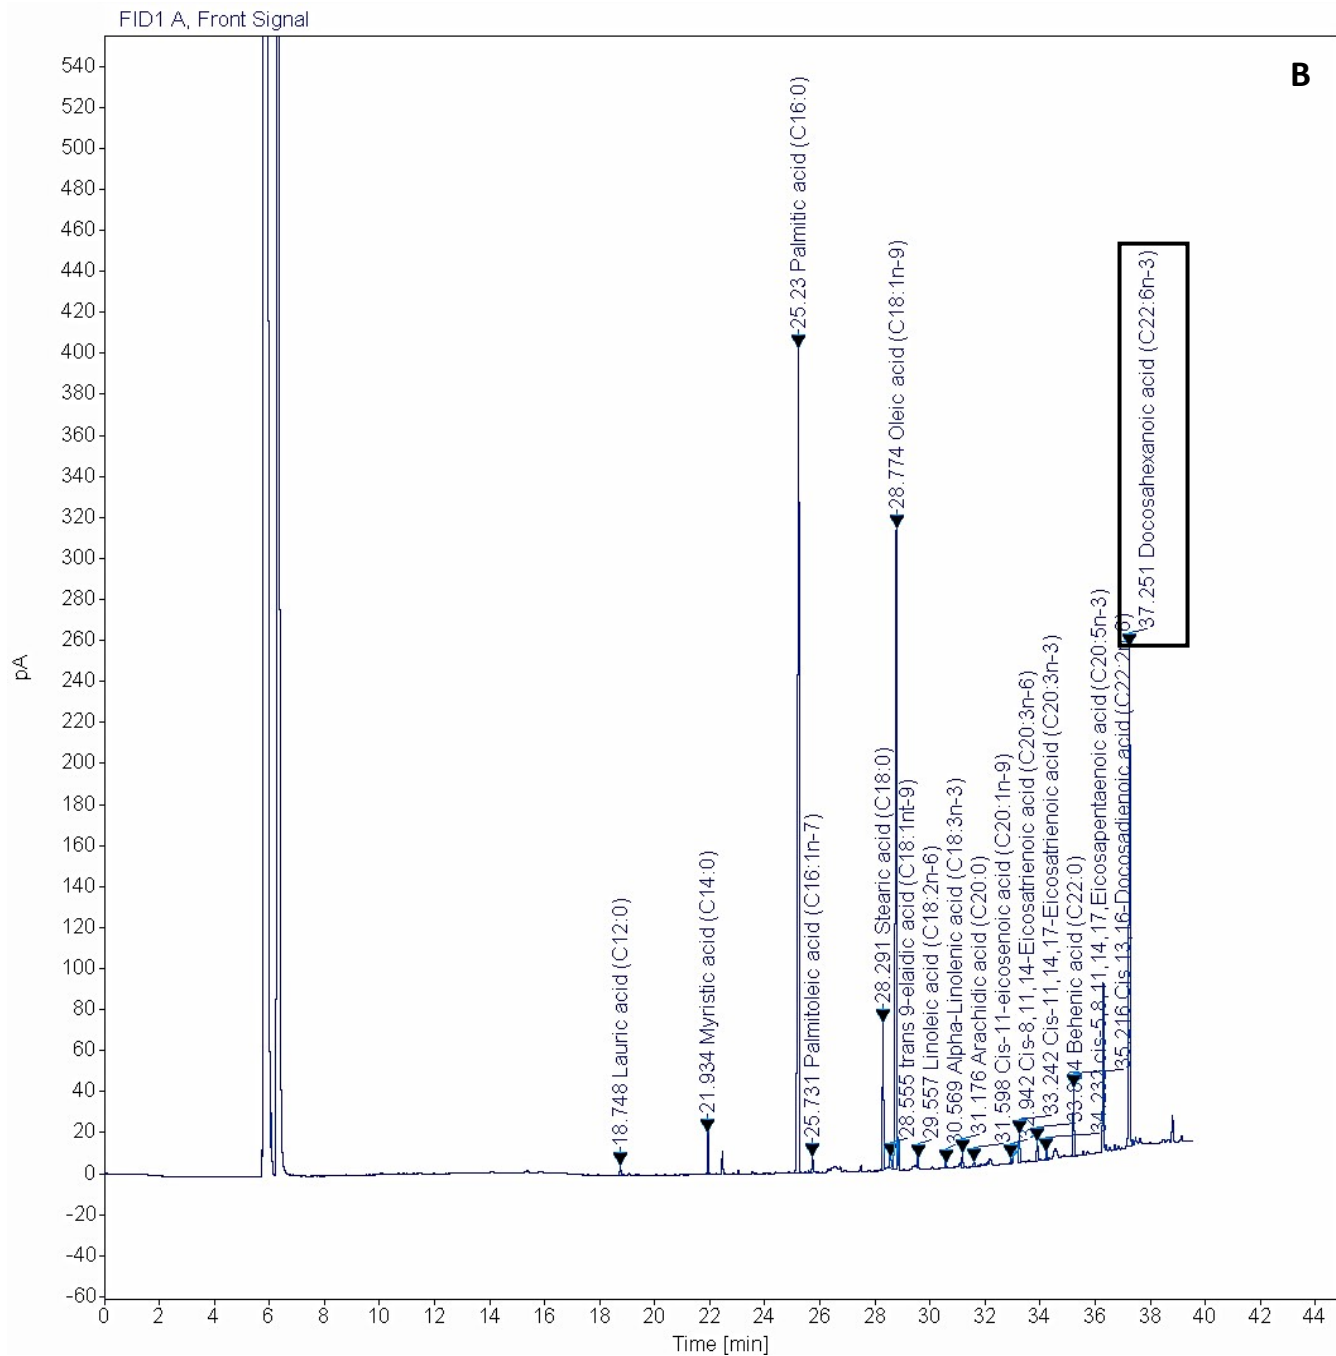

C

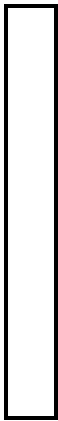

**Figure 2-** GC-FID chromatograms of algal DHA oil **(A)** and chitosan stabilized DHA nanoemulsion at **(B)** day 0 and **(C)** day 28.

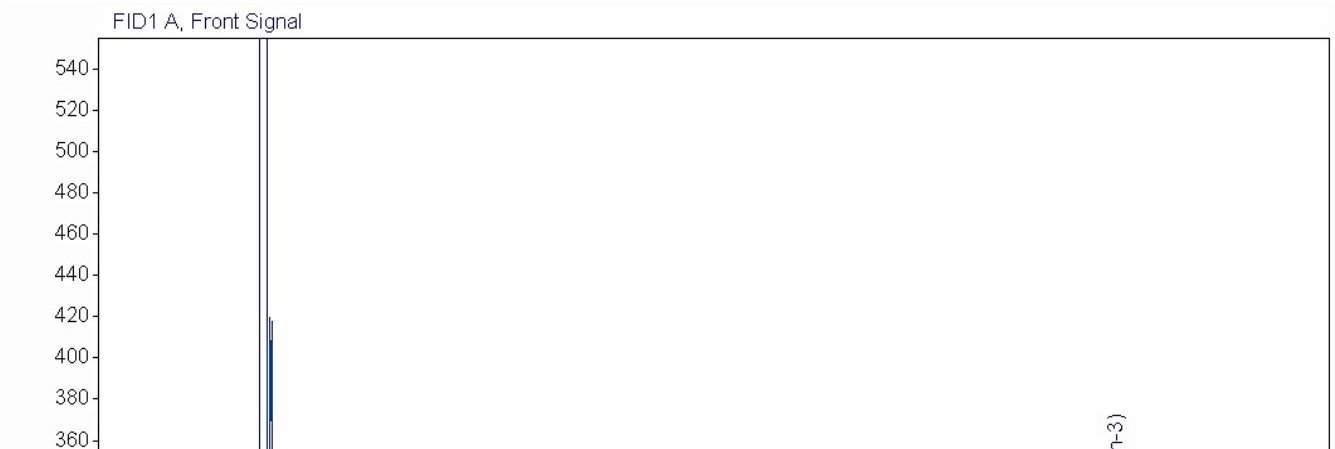

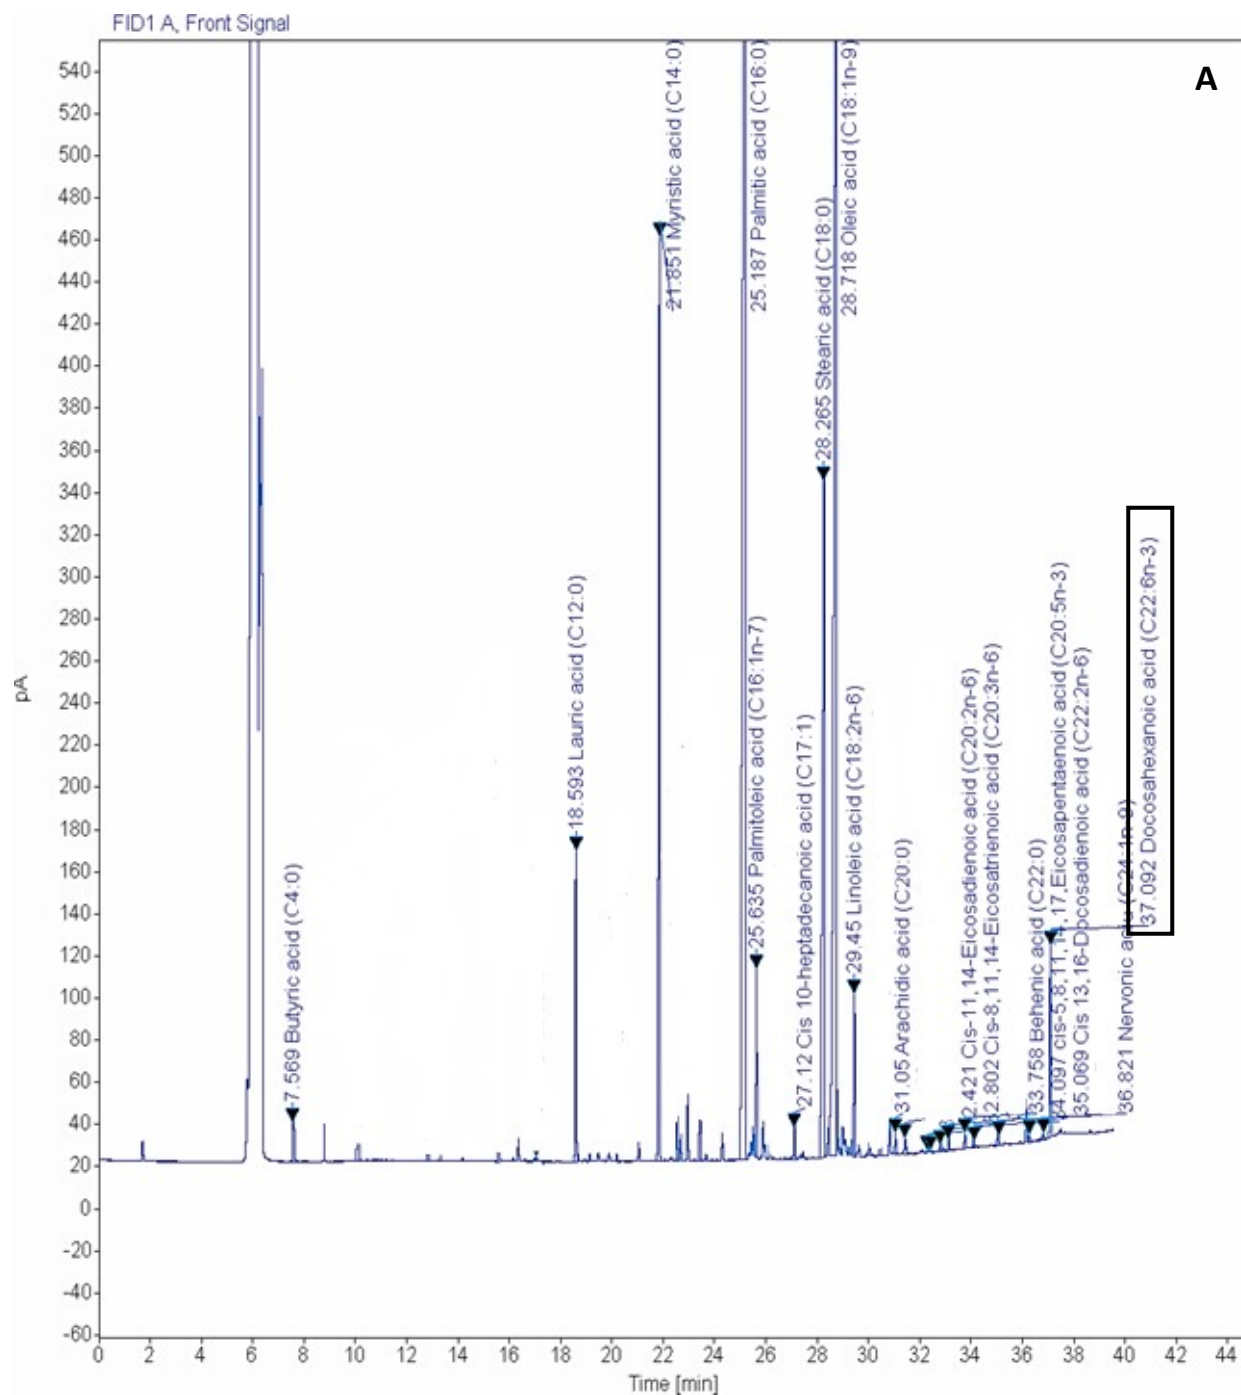

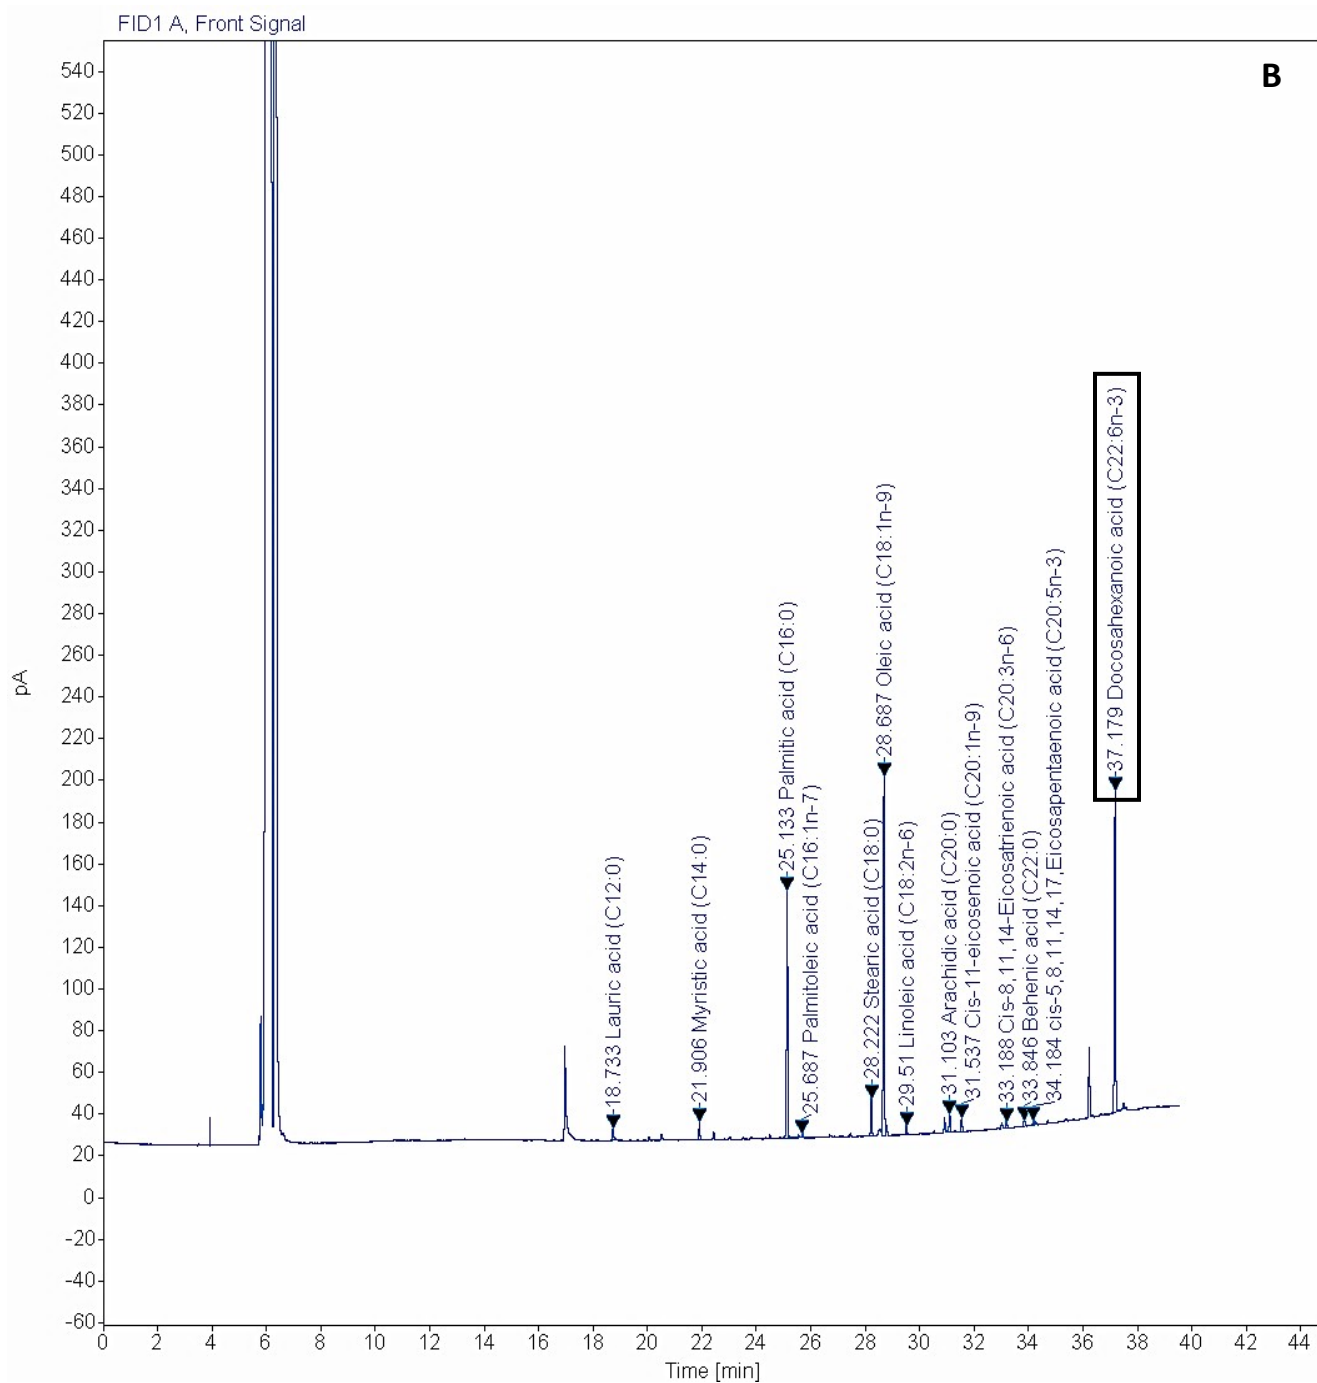

**Figure 3-** GC-FID chromatograms of DHA fortified kalakand at day 28. **(A)** DHA oil fortified kalakand and **(B)** chitosan DHA nanoemulsion fortified kalakand.
